# THE AMERICAN JOURNAL OF PSYCHIATRY

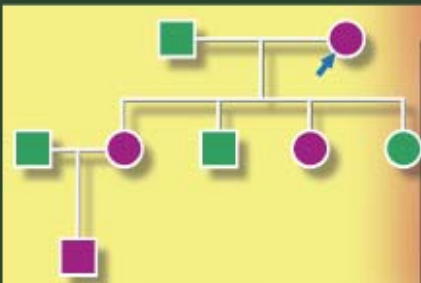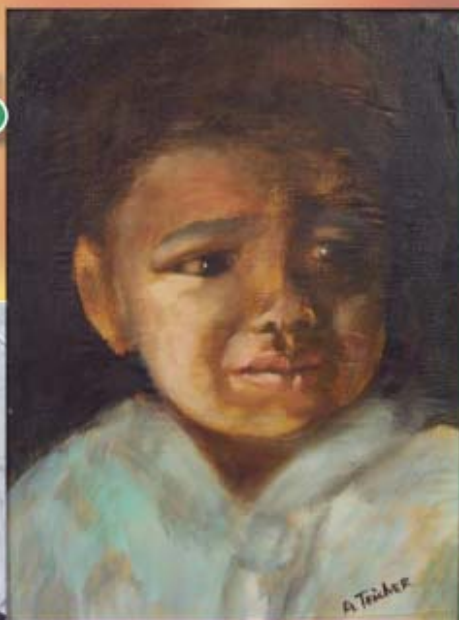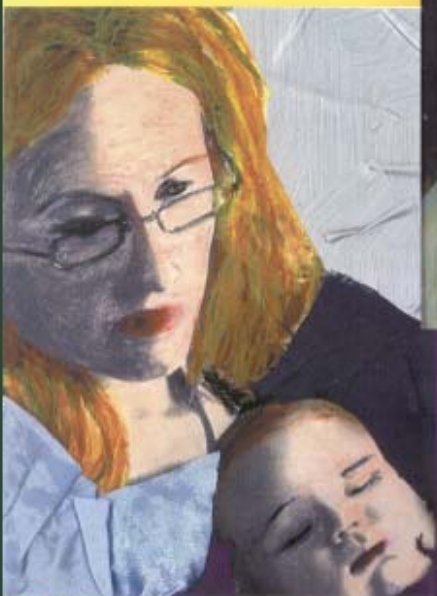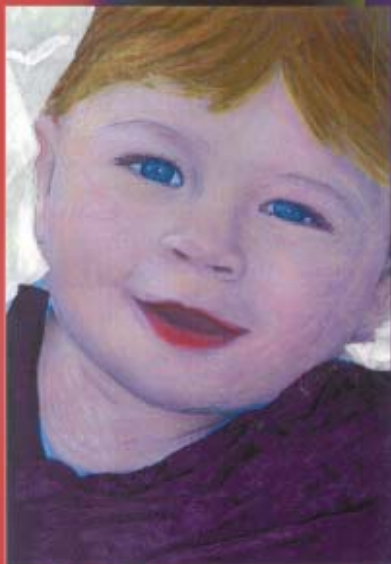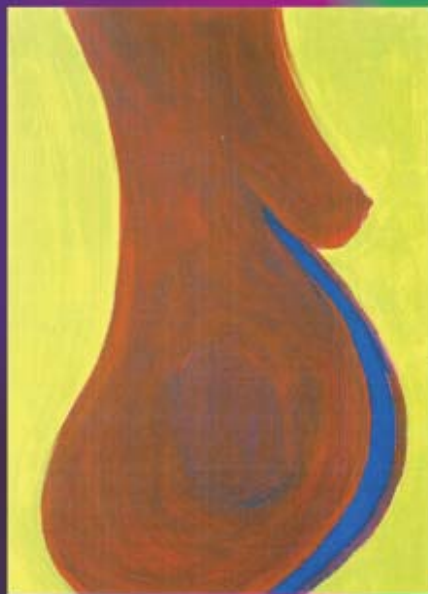

**Sticks, Stones, and Hurtful Words:  
Relative Effects of Various Forms of  
Childhood Maltreatment**

Martin H. Teicher et al. 993

**Offspring of Depressed Parents:  
20 Years Later**

Myrna M. Weissman et al. 1001

**Internalizing Behaviors in  
4-Year-Old Children Exposed in  
Utero to Psychotropic Medications**

Shaila Misri et al. 1026

**Ventrolateral Prefrontal Cortex  
Activation and Attentional Bias  
in Response to Angry Faces in  
Adolescents With Generalized  
Anxiety Disorder**

Christopher S. Monk et al. 1091

June 2006

Volume 163 • Number 6

Official Journal of the  
AMERICAN PSYCHIATRIC ASSOCIATION

[ajp.psychiatryonline.org](http://ajp.psychiatryonline.org)
