# THE AMERICAN JOURNAL OF PSYCHIATRY

## EDITOR-IN-CHIEF

Robert Freedman, M.D.

## DEPUTY EDITORS

David A. Lewis, M.D.

Robert Michels, M.D.

Daniel S. Pine, M.D.

Susan K. Schultz, M.D.

Carol A. Tamminga, M.D.

## EDITORIAL STAFF

### Editorial Director

Sandra L. Patterson

### Editorial Manager

Michael D. Roy

### Senior Editors

John J. Guardiano, Ph.D.  
Leannah M. Harding, E.L.S.  
Jane Weaver, E.L.S.

### Assistant Editor

Angela Moore

### Production Editor

Julie C. Blair

### Graphic Designer

Jason Glance

### Peer Review Administrator

Molly Douglas

### Editorial Assistants

Lisa Devine  
Astewaye Yigzaw

### Assistants to the Editors

Lois Campbell  
Aniko Evans  
Rachel Hogg  
Russell A. Scholl

## ASSOCIATE EDITORS

Francine M. Benes, M.D., Ph.D.

Wade H. Berrettini, M.D., Ph.D.

Kathleen T. Brady, M.D., Ph.D.

David P. Brent, M.D.

Cameron S. Carter, M.D.

J. Raymond DePaulo, Jr., M.D.

Leon Eisenberg, M.D.

Glen O. Gabbard, M.D.

Howard H. Goldman,  
M.D., Ph.D.

Jeffrey A. Lieberman, M.D.

Robert C. Malenka, M.D., Ph.D.

Maria A. Oquendo, M.D.

Barbara L. Parry, M.D.

Larry J. Siever, M.D.

Myrna M. Weissman, Ph.D.

## EDITORS EMERITI

Nancy C. Andreasen,  
M.D., Ph.D.

John C. Nemiah, M.D.

## FORMER EDITORS

Amariah Brigham, M.D.  
1844-1849

T. Romeyn Beck, M.D.  
1849-1854

John P. Gray, M.D.  
1854-1886

G. Alder Blumer, M.D.  
1886-1894

Richard Dewey, M.D.  
1894-1897

Henry M. Hurd, M.D.  
1897-1904

Edward N. Brush, M.D.  
1904-1931

Clarence B. Farrar, M.D.  
1931-1965

Francis J. Braceland, M.D.  
1965-1978

The American Journal of Psychiatry is online at [ajp.psychiatryonline.org](http://ajp.psychiatryonline.org)

# THE AMERICAN PSYCHIATRIC ASSOCIATION

1000 Wilson Blvd., Suite 1825, Arlington, VA 22209-3901  
(888) 357-7924 (toll-free inside the U.S. and Canada) / (703) 907-7300  
web site: [www.psych.org](http://www.psych.org) / e-mail: [apa@psych.org](mailto:apa@psych.org)

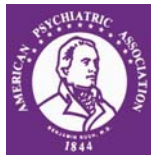

## OFFICERS 2005–2006

|                            |                                   |
|----------------------------|-----------------------------------|
| <b>President</b>           | Steven S. Sharfstein, M.D.        |
| <b>President-Elect</b>     | Pedro Ruiz, M.D.                  |
| <b>Vice-President</b>      | Nada L. Stotland, M.D.,<br>M.P.H. |
| <b>Secretary-Treasurer</b> | Carolyn B. Robinowitz,<br>M.D.    |

## ASSEMBLY

|                      |                            |
|----------------------|----------------------------|
| <b>Speaker</b>       | Joseph Ezra V. Rubin, M.D. |
| <b>Speaker-Elect</b> | Michael Blumenfield, M.D.  |
| <b>Recorder</b>      | Jeffrey Akaka, M.D.        |

## MEDICAL DIRECTOR'S OFFICE

|                                                                               |                                   |
|-------------------------------------------------------------------------------|-----------------------------------|
| <b>Medical Director</b>                                                       | James Scully, M.D.                |
| <b>Chief Executive Officer,<br/>American Psychiatric<br/>Publishing, Inc.</b> | Ronald E. McMillen                |
| <b>Executive Director,<br/>APIRE<br/>Division of Research</b>                 | Darrel A. Regier, M.D.,<br>M.P.H. |

## BOARD OF TRUSTEES

|                                |                                 |
|--------------------------------|---------------------------------|
| Paul S. Appelbaum, M.D.        | James E. Ninninger, M.D.        |
| Tanya R. Anderson, M.D.        | Donna M. Norris, M.D.           |
| Renee L. Binder, M.D.          | Roger Peele, M.D.               |
| Thomas K. Ciesla, M.D.         | Michelle B. Riba, M.D., M.S.    |
| Mary Helen Davis, M.D.         | Anne Marie T. Sullivan,<br>M.D. |
| David Fassler, M.D.            | Albert V. Vogel, M.D.           |
| Marcia K. Goin, M.D.,<br>Ph.D. | Sidney H. Weissman, M.D.        |
| Daniel T. Mamah, M.D.          |                                 |

## AMERICAN PSYCHIATRIC PUBLISHING, INC.

### BOARD OF DIRECTORS 2005-2006

|                            |                                         |
|----------------------------|-----------------------------------------|
| <b>President and Chair</b> | Thomas N. Wise, M.D.                    |
| <b>Secretary</b>           | Glen O. Gabbard, M.D.                   |
| <b>Treasurer</b>           | Nada L. Stotland, M.D.,<br>M.P.H.       |
| Francine Cournos, M.D.     | Alan F. Schatzberg, M.D.                |
| John M. Oldham, M.D.       | Donna E. Stewart, M.D.,<br>F.R.C.P.(C.) |
| Laura W. Roberts, M.D.     |                                         |

### EX-OFFICIO MEMBERS

|                                                  |                               |
|--------------------------------------------------|-------------------------------|
| <b>APA President</b>                             | Steven S. Sharfstein, M.D.    |
| <b>APA President Elect</b>                       | Pedro Ruiz, M.D.              |
| <b>APA Secretary-Treasurer</b>                   | Carolyn B. Robinowitz, M.D.   |
| <b>APA Medical Director</b>                      | James Scully, M.D.            |
| <b>Editor-in-Chief,<br/>Psychiatric Services</b> | Howard Goldman, M.D.          |
| <b>Editor-in-Chief, Books</b>                    | Robert E. Hales, M.D., M.B.A. |

The American Journal of Psychiatry is online at [ajp.psychiatryonline.org](http://ajp.psychiatryonline.org)

# THE AMERICAN PSYCHIATRIC ASSOCIATION

## Chairpersons of Councils, Commissions, Committees, and Task Forces

### Standing Committees

#### *Audit*

Carolyn B. Robinowitz, M.D.

#### *Finance and Budget*

Jack W. Bonner III, M.D.

#### *Bylaws*

William C. Wood, M.D.

#### *Elections*

David Samuel Wahl, M.D.

#### *Ethics*

Spencer Eth, M.D.

#### *Executive and Officer Compensation*

Allan Tasman, M.D.

#### *Investment Oversight*

Maria T. Lymberis, M.D.

#### *Joint Reference*

Pedro Ruiz, M.D.

#### *Membership*

Mary K. Marrocco, M.D.

#### *Nominating*

Michelle B. Riba, M.D.

#### *Tellers*

### Council on Addiction Psychiatry

Eric C. Strain, M.D.

#### *Training and Education in Addiction Psychiatry*

John A. Renner, Jr., M.D.

#### *Treatment Services for Patients With Addictive Disorders*

Petros Levounis, M.D.

### Council on Advocacy and Public Policy

Jeremy Allan Lazarus, M.D.

#### *Committee on Government Relations*

Tom Enderby Noyes, M.D.

#### *Committee on Public Affairs*

C. Deborah Cross, M.D.

#### *Committee on Advocacy and Litigation Funding*

Jeffrey Stuart Janofsky, M.D.

### Council on Aging

Joseph A. Cheong, M.D.

#### *Access and Effectiveness of Psychiatric Services for the Elderly*

Allan A. Anderson, M.D.

#### *Ethnic Minority Elderly*

Iqbal Ahmed, M.D.

#### *Long-Term Care and Treatment for the Elderly*

Helen Hisae Kyomen, M.D.

### Council on Children, Adolescents, and Their Families

Lois Talbot Flaherty, M.D.

#### *Developmental Disabilities*

Roxanne Dryden-Edwards, M.D.

#### *Family Violence and Abuse*

Yvonne B. Ferguson, M.D.

#### *Blanche F. Ittleson Research Award*

Peter S. Jensen, M.D.

#### *Juvenile Justice Issues*

William Arroyo, M.D.

#### *Agnes Purcell McGavin Award*

Myron Lowell Belfer, M.D.

#### *Infancy and Early Childhood*

Irene Chatoor, M.D.

#### *Mental Health and Schools*

Eugenio M. Rothe, M.D.

### Council on Global Psychiatry

Rodrigo A. Munoz, M.D.

#### *Misuse and Abuse of Psychiatry*

Alan A. Stone, M.D.

#### *Psychiatric Dimensions of Disasters*

Anthony T. Ng, M.D.

### Council on Healthcare Systems and Financing

Bruce J. Schwartz, M.D.

#### *APA/Business Relations*

Norman A. Clemens, M.D.

#### *Managed Care*

Paul Henry Wick, M.D.

#### *Medicare Advisory*

Edward Gordon, M.D.

#### *Private Practice*

Frederick N. Parris, M.D.

#### *Psychiatry in the Workplace*

Steven E. Pflanz, M.D.

#### *Public Funding for Psychiatric Services*

Selby C. Jacobs, M.D.

#### *Reimbursement for Psychiatric Care*

Joseph T. English, M.D.

#### *RBRVS, Codes and Reimbursement*

Chester W. Schmidt, Jr., M.D.

### Council on Medical Education and Lifelong Learning

Joan A. Lang, M.D.

#### *APA/Bristol-Myers Squibb Fellowship Selection*

Tana Annette Grady-Weliky, M.D.

#### *APA/SAMHSA Minority Fellowship Selection and Advisory*

Evaristo O. Akerele, M.D.

#### *APA/GlaxoSmithKline Fellowship Selection and Program*

Leah Joan Dickstein, M.D.

#### *APA/Lilly Products Resident Research Award*

Carol C. Nadelson, M.D.

#### *CME/Lifelong Learning*

David Bruce Mallott, M.D.

#### *Commercial Support*

David M. McDowell, M.D.

#### *History and Library*

Avram H. Mack, M.D.

#### *Medical Student Education*

Carl Bruce Greiner, M.D.

#### *Psychiatric Administration and Management*

Sy Atezaz Saeed, M.D.

#### *Residents and Fellows*

William C. Wood, M.D.

#### *Scientific Program*

Marian I. Butterfield, M.D.

#### *Scientific Program Committee of the Institute on Psychiatric Services*

Charles W. Huffine, M.D.

#### *Vestermark Award*

Patricia Isbell Ordorica, M.D.

### Council on Member and District Branch Relations

Michael J. Vergare, M.D.

#### *Distinguished Service Award*

Steven S. Sharfstein, M.D.

#### *Newsletter of the Year*

John Chapman Urbaitis, M.D.

#### *District Branch Advisory*

#### *Physician Health, Illness and Impairment*

John Adam Fromson, M.D.

#### *Ad Hoc Work Group on Information Systems*

Robert C. Hsiung, M.D.

### Council on Minority Health and Health Disparities

Francis G. Lu, M.D.

#### *American Indian, Alaska Native and Native Hawaiian Psychiatrists*

Frank W. Brown, M.D.

#### *Asian-American Psychiatrists*

Surinder S. Nand, M.D.

#### *Black Psychiatrists*

Sandra C. Walker, M.D.

#### *Gay, Lesbian, and Bisexual Issues*

Jack Drescher, M.D.

#### *Hispanic Psychiatrists*

Ana Elisa Campo, M.D.

#### *International Medical Graduates*

Sanjay Dube, M.D.

#### *Religion, Spirituality, and Psychiatry*

John Raymond Peteet, M.D.

#### *Women*

Melva J. Green, M.D.

### Council on Psychiatry And Law

Paul S. Appelbaum, M.D.

#### *Confidentiality*

Jerome Howard Rogoff, M.D.

#### *Judicial Action*

Jeffrey L. Metzner, M.D.

#### *Manfred S. Guttmacher Award*

Michael A. Norko, M.D.

#### *Isaac Ray Award*

J. Richard Ciccone, M.D.

### Council on Psychosomatic Medicine

Philip R. Muskin, M.D.

### Council on Quality Care

John M. Oldham, M.D.

#### *AIDS*

Francine Cournos, M.D.

#### *Executive Committee for Practice Guidelines*

John S. McIntyre, M.D.

#### *Psychotherapy by Psychiatrists*

Eric Martin Plakun, M.D.

#### *Quality Indicators*

Richard C. Herman, M.D.

#### *Standards and Survey Procedures*

Steven I. Altchuler, M.D., Ph.D.

#### *Steering Committee on Practice Guidelines*

John S. McIntyre, M.D.

#### *Patient Safety*

Alfred Herzog, M.D.

### Council on Research

David J. Kupfer, M.D.

#### *Electroconvulsive and Other Electromagnetic Therapies*

Sarah H. Lisanby, M.D.

#### *Health Services Research*

Wayne Jay Katon, M.D.

#### *Prevention of Mental Disorders and Promotion of Mental Health*

William Rigby Beardslee, M.D.

David Reiss, M.D. (co-chairs)

#### *Psychiatric Diagnosis and Assessment*

Katharine Phillips, M.D.

#### *Research Awards*

Alan F. Schatzberg, M.D.

#### *Research on Psychiatric Treatments*

Alan Jay Gelenberg, M.D.

#### *Research Training*

James H. Meador-Woodruff, M.D.

### Council on Social Issues and Public Psychiatry

Jayannathan Srinivasaraghavan, M.D.

#### *Poverty, Homelessness, and Psychiatric Disorders*

Jeffrey Gress Stovall, M.D.

#### *Psychiatric Services Achievement Awards*

Jacqueline Maus Feldman, M.D.

#### *Jails and Prisons*

Henry C. Weinstein, M.D.

### Special Components

#### *Editorial Advisory Committee*

Michael F. Myers, M.D.
